# Supplementary material
Source: PubMed Central journal article supplement (PMC3617936)
Supplement: supp_M029215_jlr.M029215-1.pdf [file supp_M029215_jlr.M029215-1.pdf]

**Supplemental Figure 1- MTP ASO Reduces MTP mRNA in Mouse Primary Hepatocytes in a Dose Dependent Manner.** Mouse primary hepatocytes were transfected via electroporation w/ either a control ASO or an MTP ASO at 6 different concentrations (n=3 wells/group). After 24 hours, RNA was isolated and qPCR was carried out to analyze cellular MTP mRNA concentrations. MTP expression was normalized to total RNA as determined by Ribogreen quantitation. Values in parenthesis denote nanomolar ASO concentration. # denotes significantly different ( $p < 0.05$ ) when compared to either untransfected control (UTC) or control ASO.

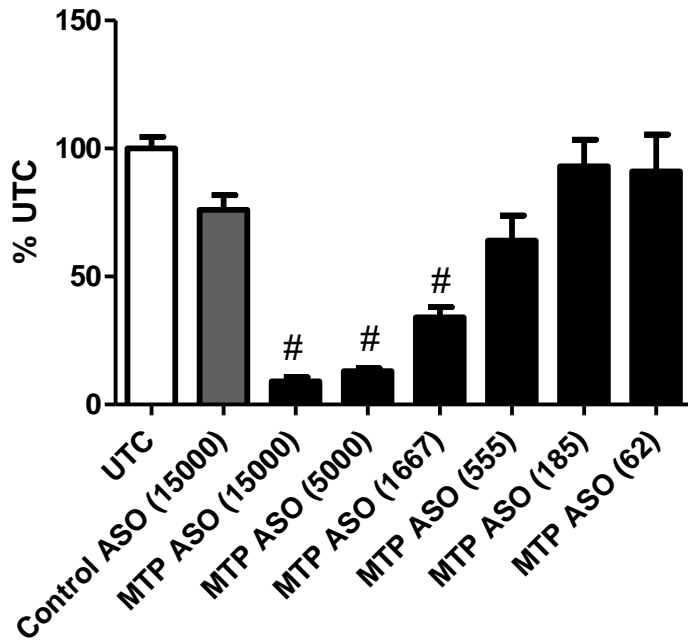

**Supplemental Table 1- Primer Probe Set Sequences Used for Quantitative Real-time PCR**

| <b>Gene</b>                     | <b>Sequence</b>                                                                                                       |
|---------------------------------|-----------------------------------------------------------------------------------------------------------------------|
| <b>ApoB</b>                     | FP: 5'-CGTGGGCTCCAGCATTCTA-3'<br>RP: 5'-AGTCATTTCTGCCTTTGCGTC-3'<br>P : 5'-CCAATGGTCGGGCACTGCTCAA-3'                  |
| <b>MTP</b>                      | FP: 5'-GGGCTGGAGTTCATCTCCAC-3'<br>RP: 5'-GCCTGTCCATCTGCATGC-3'<br>P : 5'-TGCAGTTCTCACAGTACCCGTTCTTGGTC-3'             |
| <b>AMPK<math>\alpha</math>2</b> | FP: 5'-CCGCCTCTCATCGAGA-3'<br>RP: 5'-TTCGTTGTGTTGAGTGCATCC-3'<br>P : 5'-AGCCCCAAAGCACGCTGTCCAC-3'                     |
| <b>SREBP1-c</b>                 | FP: 5'-GGAGCCATGGATTGCACATT-3'<br>RP: 5'-CCTGTCTCACCCCAAGCATA-3'<br>P : 5'-CAGCTCATCAACAACCAAGACAGTGACTTCC-3'         |
| <b>PPAR<math>\gamma</math></b>  | FP: 5'-TTCCACTATGGAGTTCATGCTTGT-3'<br>RP: 5'-GGCAGTTAAGATCACACCTATCATAAAT-3'<br>P : 5'-TTTTCCGAAGAACCATCCGATTGAAGC-3' |
| <b>FSP27</b>                    | FP: 5'-GAAGGAGATGCTCCGCTGG-3'<br>RP: 5'-AAGTGCCAAGCAGCATGTG-3'<br>P : 5'-CCCTCTCAGCATGCAGGCCACC-3'                    |
| <b>Adipsin</b>                  | FP: 5'-CGAAGGTGTGGTTACGTGGG-3'<br>RP: 5'-GGGTATAGACGCCCGGCTT-3'<br>P : 5'-TCTCGCTCTGTGGCAATGGCA-3'                    |
| <b>ACC1</b>                     | FP: 5'-CTGGCTGCATCCATTATGTCA-3'<br>RP: 5'-GGGTTGTCCAGTTGCATTTG-3'<br>P : 5'-CTGGAGCAGCACTTGACCCTGGC-3'                |
| <b>SCD-1</b>                    | FP: 5'-TCACGACCCACCTATCAGG-3'<br>RP: 5'-TTCCTCCAGACGTAAGTCCAGC-3'<br>P : 5'-TGAGGAGGGACCCCGCCC-3'                     |
| <b>Cyclophilin A</b>            | FP: 5'-TCGCCGCTTGCTGCA-3'<br>RP: 5'-ATCGGCCGTGATGTCGA-3'<br>P : 5'-CCATGGTCAACCCACCGTGTC-3'                           |
| <b>CD-36</b>                    | FP: 5'-CCTGGGAGTTGGCGAGAA-3'<br>RP: 5'-TTCCGATCACAGCCATTC-3'<br>P : 5'-ACCAGTGCTCTCCCTTGATTCTG-3'                     |

FP= Forward Primer

RP=Reverse Primer

P =Probe
